# Supplementary material for: Transcriptomic changes during regeneration of the central nervous system in an echinoderm
Source: PubMed Central journal article supplement (PMC4229883; doi:10.1186/1471-2164-15-357), 2014-05-12
Supplement: 1471-2164-15-357-S10.pdf [file 1471-2164-15-357-S10.pdf]

**Primers used for real-time qPCR**

| <b>Transcript</b>                                | <b>Forward primer (5' → 3')</b> | <b>Reverse Primer (5' → 3')</b> |
|--------------------------------------------------|---------------------------------|---------------------------------|
| <i>Myc</i>                                       | CCTACAGCCGTCTTTCCATACC          | TCCCTGCCATACTGAGATCCA           |
| <i>Nfix</i>                                      | TTGAGACAGGCAGATAAAGTATGGA       | CACAATGATGGGTTTCGCACA           |
| <i>Timp1</i>                                     | GCTGTATTCAATTAGTCCACTTCCA       | GGGATTGCTACTACAACCCATT          |
| <i>Gypsy-1_Hg</i>                                | GCTGTTCCGCACTATCATTG            | GCTGTTCCGCACTATCATTG            |
| <i>Gypsy-2_Hg</i>                                | ATGGAAACGCAGATGCTCTA            | CGGAAGTGGTTCTTGTGGTAA           |
| <i>LINE1</i>                                     | AAACCAGACGGGCTTCCTTC            | GAATGAAATTCCAGTCTATGGTATCG      |
| <i>Runx1</i>                                     | TCTTGCCAGGGTCTCCATCA            | CGGTCTTCCAAATCCAACCTCAC         |
| <i>Echinoidin</i>                                | AAAGTGTGTGTCCTTGTCATACAGC       | TGTAGGTGGAAGTAGATCCGTCAC        |
| <i>Notch 1</i>                                   | GCCAACAATGAGCGAGGATAG           | AGGGATACCTCCAAGTGACATATTC       |
| <i>Stxbp 1</i>                                   | GGGTATTCCACTCAGTTACGATTG        | GGGACAATGTTTCTCATTTGGTCTT       |
| <i>Klf2</i>                                      | GCCTCACATGAGCCTCCTGAC           | GGTGGAATTACTGCGTTGTTCTC         |
| <i>Sox2</i>                                      | GTGCCATTTGCCTTCTCTTACC          | GAGTCCACAGCCCATCGTTTC           |
| <i>Oct1</i>                                      | TCAGGGTTGCTTTGGAGAAGAG          | GGCAGCATCATAGAGGGAGGAT          |
| <i>Notch 2</i>                                   | TATATGCCGAAACACCGATGA           | AACAAGGTTCGCTTTGACG             |
| <i>Cenps</i>                                     | TATGGAAGAACAAGCGATGGA           | TTGCTTGTATGTAGCCTCAGAAATG       |
| <i>Similar to predicted protein XP_001628344</i> | TCAAGTACACTAACTGTTCCCATCT       | AACTGAAATCCCACCACCC             |
| <i>Cntn5</i>                                     | CCTTCTCCAAGCCAAAGTCG            | CCATCAGACCCACCGCAA              |
| <i>Srpx2</i>                                     | AAAGGTGCGACCTGTACTTTCAC         | GATACAATTCGGGATTTCTGTGTT        |
| <i>Gypsy-20_Hg</i>                               | GGGGAATACTAGACCTACAGAATGG       | GGTGGAATGGTAACAGTTTCAGC         |
| <i>Jockey mobile element</i>                     | CTGAGGGGTCAAGTAGAAGGGA          | CTTAAACCTCCTGAAGACAAACCA        |
| <i>Neurotrypsin</i>                              | GGATGATAATGATGCCACGGTA          | CACCGATACTTGTTTCTGAACCAG        |

**Reference genes**

| <b>Transcript</b> | <b>Forward primer (5' → 3')</b> | <b>Reverse Primer (5' → 3')</b> |
|-------------------|---------------------------------|---------------------------------|
| <i>Rpl18a</i>     | AACAAGGAGACCAGCTACCAACT         | ATGTAATTCCAACCCACTTTCAGG        |
| <i>Atp6l</i>      | CGGAGCAGGACTTAGTGTCG            | TTCCAACAAACAAACGAGGCT           |
| <i>Eef2</i>       | TGAAGGTCCACGAGACGATCC           | CAGAGAAGACACGACCAAAGGC          |
| <i>Sod</i>        | CTCACTAAGCCCTGAAACGACA          | ACGGTTCTTCGCTTTCTACTTCA         |
